# Supplementary material for: Epithelial dysfunction as a driver of symptoms in gastrointestinal disorders
Source: Research Square preprint supplement (doi:10.21203/rs.3.rs-7535904/v1), 2025-09-11
Supplement: Supplementary file 1 [file 02d044b80601486d27380ddf.docx]

EGA access tokens (links) for the datasets produced in this study:

<https://ega-archive.org/studies/EGAS50000000453>
<https://ega-archive.org/studies/EGAS50000001067>
<https://ega-archive.org/studies/EGAS50000001168>
